# Supplementary material for: Autologous hematopoietic cell transplantation in diffuse large B-cell lymphoma after three or more lines of prior therapy: evidence of durable benefit
Source: PubMed Central journal article supplement — Haematologica. 2022 Feb 3;107(5):1214–7. doi: 10.3324/haematol.2021.279999 (PMC9052914; doi:10.3324/haematol.2021.279999), 2022-02-03
Supplement: 2021_279999_MEI_SUPPL.pdf [file 2021_279999_MEI_SUPPL.pdf]

**Autologous hematopoietic cell transplantation in diffuse large B-cell lymphoma after three or more lines of prior therapy: evidence of durable benefit**

Matthew Mei,<sup>1</sup> Mehdi Hamadani,<sup>2</sup> Kwang W. Ahn,<sup>3,4</sup> Yue Chen,<sup>4</sup> Mohamed A. Kharfan-Dabaja,<sup>5</sup> Craig Sauter<sup>2</sup> and Alex F. Herrera<sup>1</sup>

<sup>1</sup>Department of Hematology and Hematopoietic Cell Transplantation, City of Hope, Duarte, CA; <sup>2</sup>BMT & Cellular Therapy Program, Department of Medicine, Medical College of Wisconsin, Milwaukee, WI; <sup>3</sup>Division of Biostatistics, Medical College of Wisconsin, Milwaukee, WI; <sup>4</sup>Center for International Blood and Marrow Transplant Research, Milwaukee, WI and <sup>5</sup>Division of Hematology-Oncology and Blood and Marrow Transplantation Program, Mayo Clinic, Jacksonville, FL, USA

Correspondence: MEHDI HAMADANI - [mhamadani@mcw.edu](mailto:mhamadani@mcw.edu)

doi:10.3324/haematol.2024.279999

**Supplemental Table 1. Variables tested in Cox proportional hazards regression model**

Main effect:

- **CR vs. PR**

Patient-related:

- **Age at transplant, Continuous & by age group: decades**
- **Race – White vs. African American vs. Others vs. Missing**
- **Karnofsky performance status at transplant: 90-100 vs. < 90 vs. missing**

Disease-related:

- **Interval between diagnosis and HCT**
- **Conditioning: BEAM vs. R-BEAM**
- **Year of transplant**
- **Early chemoimmunotherapy failure: No vs. yes**

**CR: complete remission; PR: partial remission; BEAM: carmustine, etoposide, cytarabine, melphalan; R-BEAM: rituximab + BEAM**

**Supplemental Table 2. Multivariable regression analysis of outcomes**

| <b>Non-relapse mortality</b>     | <b>N</b> | <b>HR (95% CI)</b> | <b>p-value</b> |
|----------------------------------|----------|--------------------|----------------|
| CR                               | 154      | 1                  |                |
| PR                               | 131      | 1.09 (0.58-2.06)   | 0.80           |
| <b>Progression/relapse</b>       | <b>N</b> | <b>HR (95% CI)</b> | <b>p-value</b> |
| CR                               | 154      | 1                  |                |
| PR                               | 131      | 1.59 (1.13-2.24)   | 0.008          |
| <b>Progression free survival</b> | <b>N</b> | <b>HR (95% CI)</b> | <b>p-value</b> |
| CR                               | 154      | 1                  |                |
| PR                               | 131      | 1.46 (1.08-1.97)   | 0.01           |
| <b>Overall Survival</b>          | <b>N</b> | <b>HR (95% CI)</b> | <b>p-value</b> |
| CR                               | 154      | 1                  |                |
| PR                               | 131      | 1.55 (1.12-2.15)   | 0.009          |

**CR: complete remission; PR: partial remission**

**Supplemental Table 3. Regimens used in the 3L setting**

|                                           |            |
|-------------------------------------------|------------|
| <b>ICE +/- rituximab</b>                  | <b>101</b> |
| <b>Gemcitabine/platinum +/- rituximab</b> | <b>11</b>  |
| <b>ESHAP/DHAP +/- rituximab</b>           | <b>26</b>  |
| <b>Hyper-CVAD-like +/- rituximab</b>      | <b>16</b>  |

**ICE: ifosfamide, carboplatin, etoposide; ESHAP: etoposide, methylprednisolone, cytarabine, cisplatin; DHAP: dexamethasone, cytarabine, cisplatin; Hyper-CVAD: cyclophosphamide, vincristine, adriamycin, dexamethasone**
